# Supplementary material for: Sulfonation of alginate grafted with polyacrylamide as a potential binder for high-capacity Si/C anodes
Source: Royal Society of Chemistry journal article supplement (doi:10.1039/d0ra07557d), 2020-01-01
Supplement: d0ra07557d1.pdf [file d0ra07557d1.pdf]

## Supporting information

### Sulfonation of alginate grafted with polyacrylamide as a potential binder for high-capacity Si/C anodes

Bolormaa Gendensuren<sup>†</sup>, Chengxiang He<sup>†</sup>, Eun-Suok Oh\*

School of Chemical Engineering, University of Ulsan, 93 Daehak-ro, Nam-Gu, Ulsan 44610, Republic of Korea, \*esoh1@ulsan.ac.kr

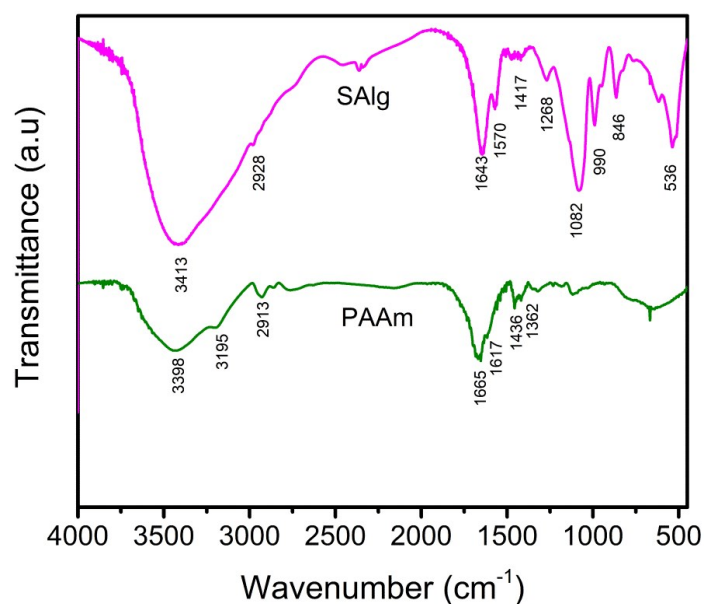

Fig. S1 FT-IR spectrometry of sulfonated Alg and of a synthetic PAAm

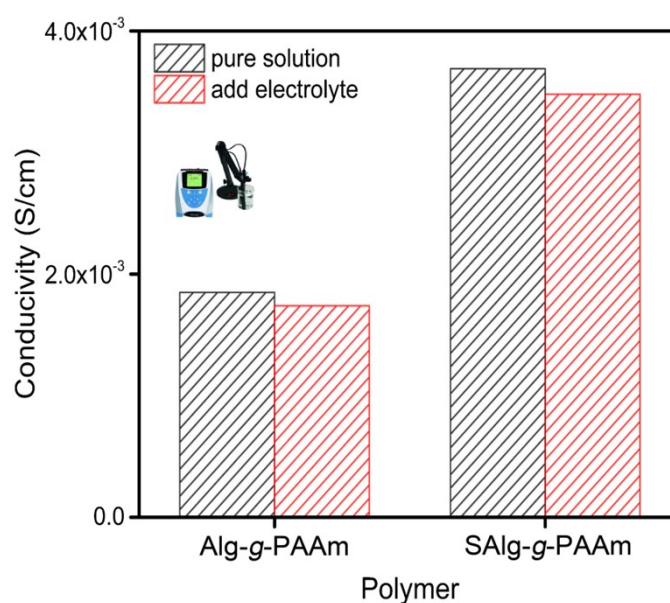

**Fig. S2** Ionic conductivity of the polymeric binder solution

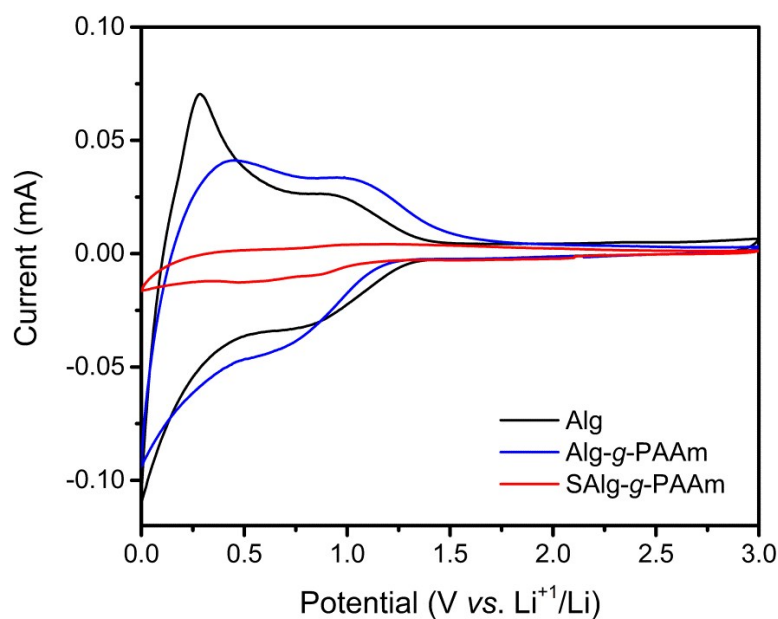

**Fig. S3** CV curve of carbon black/binder with a 50/50 wt% ratio as HS-3E flat cell

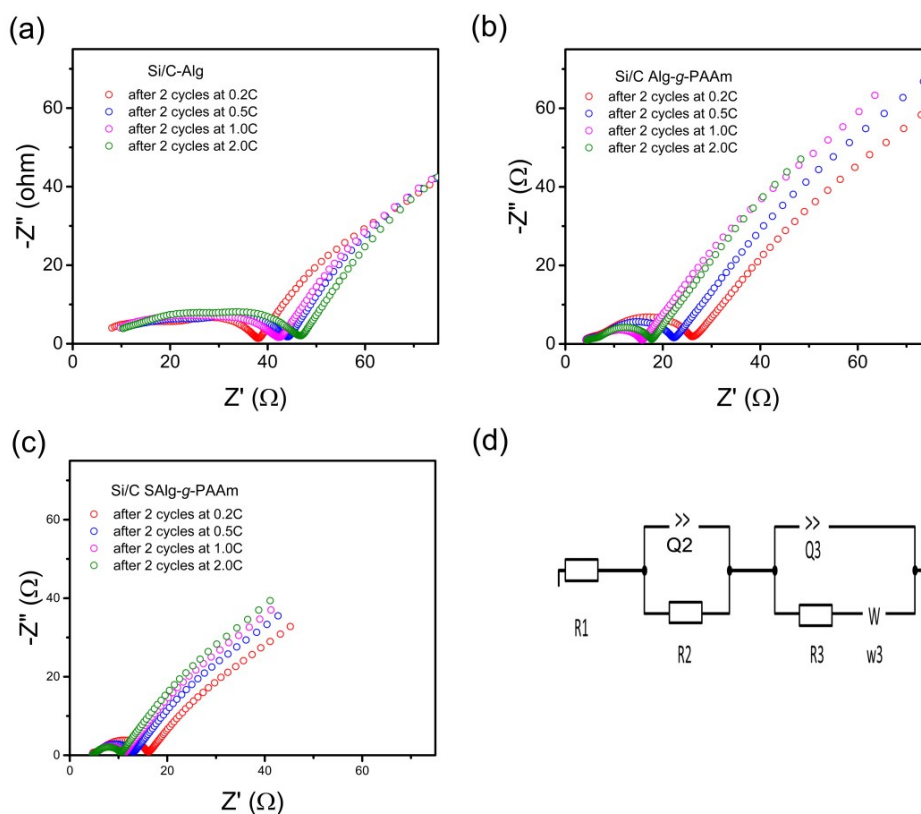

**Fig. S4** Nyquist plot of the Si/C electrodes containing different binders measured after cycled process at various currents: (a) Alg, (b) Alg-g-PAAm, and (c) SAlg-g-PAAm. The cells were each cycled two times at each current, from 0.1 C to 2.0 C subsequently. After each step, EIS was measured at 0.2 V in the frequency range of 100 kHz – 0.01 Hz. (d) Equivalent circuits for the electrodes.

**Table S1** Comparison on the Si/C composite electrodes containing different binders

| Target binder                            | Electrode formulation (wt.%)     | Mass loading of electrode (mg/cm <sup>2</sup> ) | Cycling performance                                                    | DOI                            |
|------------------------------------------|----------------------------------|-------------------------------------------------|------------------------------------------------------------------------|--------------------------------|
| Sulfonated Alginate-graft-Polyacrylamide | Si/C(1:3):binder:SP<br>76:15:9   | 1.1± 0.1                                        | 750 mAh/g at 200 <sup>th</sup> cycles at 0.5C                          | This work                      |
|                                          |                                  | 1.4± 0.1                                        | 780 mAh/g at 200 <sup>th</sup> cycles at 0.5C                          |                                |
| Sodium Polyacrylate                      | SiNPs:C:binder:KB<br>20:60:10:10 | 1                                               | 616 mAh/g at 30 <sup>th</sup> cycles at a rate of 50 mA/g              | 10.1021/jp204817h              |
| Polyacrylic acid with different NAOH     | SiNPs:C:binder:KB<br>30:50:10:10 | 0.4-0.6                                         | 1300 mAh/g at 20 <sup>th</sup> cycles at a rate of 50 mA/g             | 10.1039/c4cp04939j             |
| Acrylic adhesive binder                  | Si/C:binder:AB<br>85:10:5        | -                                               | 500 mAh/g at 50 <sup>th</sup> cycle at rate of 0.2 mA cm <sup>-2</sup> | 10.1007/s10800-006-9191-2      |
| Polyacrylonitrile                        | Si:C:binder:VGCF<br>20:60:15:5   | 1.13 ± 0.02                                     | more than 600 mAh/g at 50 <sup>th</sup> cycles at 0.5C                 | 10.1016/j.elecom.2013.01.010   |
| Lithium substituted Polyacrylic acid     | Si:C:binder:CB<br>15:73:10:2     | 3.3                                             | 704 ± 84 mAh/g at 90 <sup>th</sup> cycles at C/20 (half cell)          | 10.1016/j.jpowsour.2018.02.085 |
